# Supplementary material
Source: publisher figshare collection journal article supplement (https://sage.figshare.com/ndownloader/files/15681134)
Supplement: Supplementary file 1 [file 15681134]

**Key extracted data within narrative A: The experiences of family members witnessing the diminishing drinking of a dying relative**

Acronyms used: Artificial nutrition and hydration (ANH). Clinically assisted hydration (CAH)

**Style Definition:** references: Space Before: Auto, After: Auto, Line spacing: single

| Citation and location                                  | Aim                                                                                               | Care setting                               | Participants                                                                                              | Methodology     | Data collection                        | Data analysis                             | Key relevant findings                                                                                                                                                                                                                                                                                                                                | Relevant recommendations                                                                                                                                                                                                                                                                  |
|--------------------------------------------------------|---------------------------------------------------------------------------------------------------|--------------------------------------------|-----------------------------------------------------------------------------------------------------------|-----------------|----------------------------------------|-------------------------------------------|------------------------------------------------------------------------------------------------------------------------------------------------------------------------------------------------------------------------------------------------------------------------------------------------------------------------------------------------------|-------------------------------------------------------------------------------------------------------------------------------------------------------------------------------------------------------------------------------------------------------------------------------------------|
| Meares 1997, USA <sup>1</sup>                          | To explore the meaning of gradual cessation of eating and drinking described by women caregivers. | Adult in-home hospice patients             | 12 women, bereaved family members and primary caregivers of cancer patients who had died at home          | Phenomenology   | Interviews                             | Line-by-line coding and thematic analysis | Seven key themes were identified. These were the meaning of food, caregiver as sustainer, current losses, personal responses, ceasing to be-starved to death, being bereaved—the meaning now and paradox.                                                                                                                                            | Each situation needs individual assessment and clarification of the values of family members. Nurses may need to open discussions proactively and initiate them early. Further research might include consideration of ethical decision-making and diverse cultural and disease contexts. |
| McClement, Degner and Harlos 2004, Canada <sup>2</sup> | To report on a sub-theme of wider research entitled 'fighting back: It's best to eat.             | Specialist palliative care in-patient unit | 13 adult in-patients, mostly with cancer, 13 family members, 10 bereaved family members, 11 professionals | Grounded theory | Participant observation and interviews | Grounded theory                           | The strategies family members used to encourage food and fluid intake were targeting the patient, food manipulation and the health care provider. Efforts to increase fluid intake comprised auditing care, blaming healthcare providers and petitioning for remedial intervention. These strategies can be emotionally difficult for professionals. | Healthcare providers need to anticipate, acknowledge and assess concerns and elicit the expectations of family members regarding care. More research needed for non-malignant groups.                                                                                                     |

|                                                  |                                                                                                                   |                                                                                      |                                                                                                     |                                   |                                        |                                                        |                                                                                                                                                                                                                                                                                                                                                                                |                                                                                                                                                                                                                                   |
|--------------------------------------------------|-------------------------------------------------------------------------------------------------------------------|--------------------------------------------------------------------------------------|-----------------------------------------------------------------------------------------------------|-----------------------------------|----------------------------------------|--------------------------------------------------------|--------------------------------------------------------------------------------------------------------------------------------------------------------------------------------------------------------------------------------------------------------------------------------------------------------------------------------------------------------------------------------|-----------------------------------------------------------------------------------------------------------------------------------------------------------------------------------------------------------------------------------|
| McClement, and Harlos 2008, Canada <sup>3</sup>  | To report on a sub-theme of wider research entitled 'letting nature take its course: it's best not to eat'.       | Specialist palliative care in-patient unit                                           | 13 in-patients, mostly with cancer, 13 family members, 10 bereaved family members, 11 professionals | Grounded theory                   | Participant observation and interviews | Grounded theory                                        | The strategies family members who accepted declining intake as a 'normal' part of dying involved 'finding other ways to care'. These included participating in physical care, being present and protecting.                                                                                                                                                                    | More research needed to test the findings, explore the issue in differing cultural contexts and investigate complexities of nutritional care.                                                                                     |
| Yamagishi et al. 2010, Japan <sup>4</sup>        | To clarify the levels and determinants of family members' distress about patients' cessation of oral nourishment. | Bereaved relatives of cancer patients who had died in palliative care units          | 452 bereaved family members                                                                         | Nationwide cross-sectional survey | Piloted questionnaire                  | Univariate and logistic regression analysis using SPSS | 71% found a relative becoming unable to drink very distressing or distressing; 60% felt a need for much, some or considerable improvement in professional practice; 69% reported helplessness and guilt; 60% had believed dehydration causes distress and 58% believed CAH is a minimum standard of care. 68% perceived professionals paid enough attention to their concerns. | Health professionals should relieve family members' helplessness and guilt, provide appropriate information, understand family concerns and provide emotional support.                                                            |
| Raijmakers et al. 2013, New Zealand <sup>5</sup> | To understand family members' concerns about decreasing oral intake of dying patients.                            | Specialist palliative care service including in-patient, community and hospital team | Bereaved relatives of people who had died under specialist palliative care service                  | Qualitative (cit)                 | One-to-one semi-structure interviews   | Thematic analysis                                      | Oral intake at end of life was meaningful for relatives due to its nutritional value, enjoyment, social function, daily rhythm and expression of caring and love. It was distressing when the intake of patients declined. Some viewed decreasing intake as                                                                                                                    | Healthcare professionals should be aware of broader meaning of declining intake to family members and that many aspects of the concerns of family members about decreasing intake cannot be addressed by artificial nutrition and |

|  |  |  |  |  |  |  |                                                                                                                                                                                                                                                                                                                                                                                 |                                                                       |
|--|--|--|--|--|--|--|---------------------------------------------------------------------------------------------------------------------------------------------------------------------------------------------------------------------------------------------------------------------------------------------------------------------------------------------------------------------------------|-----------------------------------------------------------------------|
|  |  |  |  |  |  |  | <p>a normal part of process of dying but others viewed it as the patient's choice to 'give up'. This left some family members feeling helpless and others relieved of the imperative to feed. Some felt caught in a vicious circle in which both patient and family did not want each other to worry. Participants recalled little communication with health professionals.</p> | <p>nutrition (ANH). Conversations with family members are needed.</p> |
|--|--|--|--|--|--|--|---------------------------------------------------------------------------------------------------------------------------------------------------------------------------------------------------------------------------------------------------------------------------------------------------------------------------------------------------------------------------------|-----------------------------------------------------------------------|

| Key extracted data within Narrative B: The experiences of family members regarding intervention for diminishing drinking and its consequences. (Family members' perspective) |                                                                                                                                                                  |                                   |                                                                           |              |                       |                                                                                    |                                                                                                                                                                                                                                           |                                                                |
|------------------------------------------------------------------------------------------------------------------------------------------------------------------------------|------------------------------------------------------------------------------------------------------------------------------------------------------------------|-----------------------------------|---------------------------------------------------------------------------|--------------|-----------------------|------------------------------------------------------------------------------------|-------------------------------------------------------------------------------------------------------------------------------------------------------------------------------------------------------------------------------------------|----------------------------------------------------------------|
| Acronyms used: Artificial nutrition and hydration (ANH). Clinically assisted hydration (CAH)                                                                                 |                                                                                                                                                                  |                                   |                                                                           |              |                       |                                                                                    |                                                                                                                                                                                                                                           |                                                                |
| Citation and location                                                                                                                                                        | Aim                                                                                                                                                              | Care setting                      | Participants                                                              | Methodology  | Data collection       | Data analysis                                                                      | Key relevant findings                                                                                                                                                                                                                     | Relevant recommendations                                       |
| Musgrave, Bartal and Opstad 1996, Israel <sup>6</sup>                                                                                                                        | To identify the attitudes of patients, doctors, nurses and family members towards intravenous fluids in dying patients and their involvement in decision-making. | Adult oncology unit of a hospital | Convenience sample of 33 patients, 32 family members and 35 professionals | Pilot survey | Structured interviews | Responses categorised as positive, negative or neutral and statistically described | 81% of families were positive towards intravenous fluids for administration of medication, and symptom control. Doctors usually initiated decisions, with 13% involving family. Findings were considered contextual to Israeli community. | Wider research needed focusing on reasons for starting fluids. |

|                                             |                                                                                                                        |                                                                             |                                                                                        |                    |                                                                         |                                       |                                                                                                                                                                                                                                                                                                                            |                                                                                                                                                     |
|---------------------------------------------|------------------------------------------------------------------------------------------------------------------------|-----------------------------------------------------------------------------|----------------------------------------------------------------------------------------|--------------------|-------------------------------------------------------------------------|---------------------------------------|----------------------------------------------------------------------------------------------------------------------------------------------------------------------------------------------------------------------------------------------------------------------------------------------------------------------------|-----------------------------------------------------------------------------------------------------------------------------------------------------|
| Parkash and Burge 1997, Canada <sup>7</sup> | To describe the issues of family caregivers when making decisions regarding CAH for dying patients.                    | Home support and in-patient palliative care programme with a medical centre | 7 family members: white, middle-class Canadian of British or Irish origin              | Qualitative (cit)  | Semi-structure interviews                                               | Categorised under a priori themes     | The factors influencing caregivers were concerns about symptom distress and positive and negative effects of rehydration on this, ethics, emotional considerations, information exchange, decision-making and culture. Caregivers' perceptions of the benefits of CAH are varied and are central to their decision-making. | More timely discussions about hydration issues to consider patients' wishes, to increase provision of information and to elicit concerns of family. |
| Morita, et al. 1999, Japan <sup>8</sup>     | To clarify patients' and family members' perceptions about CAH and identify factors in their decision-making about it. | In-patient hospice                                                          | 62 hospice in-patients with cancer and 119 family members                              | Prospective survey | Structured interview<br><br>Recording of potential contributing factors | Multiple logistic regression analysis | 85% of family members believed patient could not get appropriate nutrition without CAH. 56% believed that dehydration hastens death.                                                                                                                                                                                       | More research including development of a tool to assess family members' concerns.                                                                   |
| Morita, T. et al. 2006, Japan <sup>9</sup>  | 'To clarify knowledge and beliefs of a general population regarding CAH (and other aspects of end of life care).       | General population and palliative care units                                | 2548 general population subjects and 513 bereaved family members of people with cancer | Survey             | Piloted questionnaire                                                   | Analysis of variance                  | 33-50% of participants believed ANH should be continued as minimum standard until death and 15%-31% agreed ANH relieved patient symptoms. No significant differences between those recruited from palliative care units and others.                                                                                        | Good practice in palliative care should reduce inaccurate beliefs.                                                                                  |

|                                              |                                                                                                                                             |                   |                                                                                    |                                                                          |                                             |                                  |                                                                                                                                                                                                                                                                                                                                                                                                    |                                                                                                                                                                         |
|----------------------------------------------|---------------------------------------------------------------------------------------------------------------------------------------------|-------------------|------------------------------------------------------------------------------------|--------------------------------------------------------------------------|---------------------------------------------|----------------------------------|----------------------------------------------------------------------------------------------------------------------------------------------------------------------------------------------------------------------------------------------------------------------------------------------------------------------------------------------------------------------------------------------------|-------------------------------------------------------------------------------------------------------------------------------------------------------------------------|
| Rurup et al. 2006, Netherlands <sup>10</sup> | To investigate the attitudes of physicians, nurses and relatives towards medical decisions about patients with dementia at the end of life. | 39 nursing homes  | 190 patients with advanced dementia, 75 physicians, 136 family members, 178 nurses | Survey                                                                   | Piloted questionnaire                       | Descriptive statistical analysis | 65% of family members agreed more than disagreed or fully agreed that decisions of patients who refuse to drink should be respected. Family members agreed with this more than nurses or physicians, particularly if they thought relative had more pain and discomfort at time of decision. Physicians are more confident of peaceful death in the absence of CAH than either nurses or families. | More open discussion of likelihood of CAH influencing peaceful death. Greater cognisance of different perspectives.                                                     |
| Cohen et al. 2012, USA <sup>11</sup>         | To describe the meaning of CAH for terminally ill cancer patients and their caregivers.                                                     | Hospice home care | 85 cancer patients, 84 family caregivers                                           | Hermeneutic phenomenology<br><br>Part of larger randomised control trial | Interviews on day 1 and then 4 of the trial | Thematic hermeneutic analysis    | Two themes emerged: hope – fluids were considered essential for survival, healing and staying healthy by family members; comfort – hydration was considered important for reducing pain, enhancing medication effectiveness, nourishing body, mind and spirit, and enhancing breathing and quality of life.                                                                                        | Need for individualised care. Recommends future research into meaning of dehydration and parenteral hydration and also consider cultural and gender preferences for it. |

|                                                     |                                                                                                                                       |                                      |                                          |                                                                      |                                          |                                                                                       |                                                                                                                                                                                                                                                                                                                                                                                                                                                                             |                                                                                                                                                          |
|-----------------------------------------------------|---------------------------------------------------------------------------------------------------------------------------------------|--------------------------------------|------------------------------------------|----------------------------------------------------------------------|------------------------------------------|---------------------------------------------------------------------------------------|-----------------------------------------------------------------------------------------------------------------------------------------------------------------------------------------------------------------------------------------------------------------------------------------------------------------------------------------------------------------------------------------------------------------------------------------------------------------------------|----------------------------------------------------------------------------------------------------------------------------------------------------------|
| Torres-Vigil et al., 2012, Texas, USA <sup>12</sup> | To identify whether patients with advanced cancer and their caregivers view CAH as food or medicine.                                  | Hospice home care                    | 54 cancer patients, 68 family caregivers | Optional and additional qualitative part of randomised control trial | Asked a single question during interview | Chi squared analysis for correlation using SPSS                                       | 38% of participants felt fluid was more like food, 34% felt it was more like medicine and 14% as both. Ethnic minority participants more likely to view fluid as food (66%) compared with white participants (42%) but no other significant differences.                                                                                                                                                                                                                    | Professionals need to ask patients and caregivers about their perceptions to enhance communication and culturally appropriate care.                      |
| Bükki et al. 2014, Germany <sup>13</sup>            | To evaluate the needs, concerns, preferences and experiences of patients and caregivers regarding decisions about ANH at end of life. | Hospital wards providing cancer care | 39 patients and 30 caregivers            | Prospective, cross-sectional survey                                  | Modified questionnaire                   | Descriptive statistics and correlation between ordinal variables assessed using SPSS. | Family members were more positive about assisted fluids and nutrition than patients when deciding on behalf of patients. No association with religiosity but advancing age was a factor in desire to forgo ANH in family and patients. Information did not change decision but did change confidence of relatives. Family concerned about pain, thirst and agitation. Family preferred detailed information from doctors; moderate satisfaction with current communication. | Early discussions focusing on addressing concerns. Research about cross-cultural differences. Assessments of level of knowledge of non-malignant groups. |

| Studies within Narrative B: The experiences of family members regarding intervention for diminishing drinking and its consequences. (Professionals' perspective) |                                                                                                                                            |                                                                   |                                                    |                    |                                         |                                                           |                                                                                                                                                                                                                            |                                                                                                                                                                 |
|------------------------------------------------------------------------------------------------------------------------------------------------------------------|--------------------------------------------------------------------------------------------------------------------------------------------|-------------------------------------------------------------------|----------------------------------------------------|--------------------|-----------------------------------------|-----------------------------------------------------------|----------------------------------------------------------------------------------------------------------------------------------------------------------------------------------------------------------------------------|-----------------------------------------------------------------------------------------------------------------------------------------------------------------|
| Acronyms used: Artificial nutrition and hydration (ANH). Clinically assisted hydration (CAH)                                                                     |                                                                                                                                            |                                                                   |                                                    |                    |                                         |                                                           |                                                                                                                                                                                                                            |                                                                                                                                                                 |
| Citation                                                                                                                                                         | Aim                                                                                                                                        | Care setting                                                      | Participants                                       | Methodology        | Data collection                         | Data analysis                                             | Key findings                                                                                                                                                                                                               | Recommendations                                                                                                                                                 |
| Critchlow and Bauer, 2002, USA <sup>14</sup>                                                                                                                     | To explore how nurses working with elderly people view terminal dehydration.                                                               | Long-term care                                                    | 64 registered nurses and licensed practical nurses | Survey             | Modified Questionnaire                  | Descriptive analysis, correlated to demographic variables | Age and experiences of nurses was associated with positive perceptions of terminal hydration; however, there was considerable diversity of views.                                                                          | Recommendations for improvements in nurse education including how nurses can support decision-making with families.                                             |
| Ke et al., 2008, Taiwan <sup>15</sup>                                                                                                                            | To explore the knowledge, attitudes and behavioural intentions of nurses providing ANH for terminal cancer patients.                       | General hospital in Taiwan. Largely Buddhist or Taoist population | 197 general and intensivist nurses                 | Survey             | Self-developed structured questionnaire | Mean values and standard deviations calculated using SPSS | Nurses had reasonable general knowledge about palliative care but less knowledge of the effects of ANH. Difficulties of communicating about ANH with families and identified as one factor which influenced its provision. | Greater education regarding ANH is needed to support nurses to communicate effectively.                                                                         |
| van der Riet et al. 2008, Australia <sup>16</sup>                                                                                                                | To explore the issue of family members' desire to feed patients despite them being unable to eat and drink with health care professionals. | 2 palliative care units                                           | 15 nurses and doctors                              | Discourse analysis | 2 focus groups and 4 interviews         | Discourse analysis                                        | Three discourses were identified: family members' distress at non-provision of CAH; professionals' belief that dehydration decreases suffering and polarisation between acute and palliative care settings.                | Recommends communication, education and team approach. Staff need more information about pathophysiology of dying and clinical guidelines need to be developed. |
| van der Riet                                                                                                                                                     | To report on the                                                                                                                           | 2 palliative                                                      | 15 nurses and                                      | Discourse          | 2 focus groups                          | Discourse                                                 | The main theme identified                                                                                                                                                                                                  | Recommends exploration of                                                                                                                                       |

|                                              |                                                                                                                                                                                        |                                          |                    |                               |                         |                    |                                                                                                                                                                                                                                                                                                                                                                                                                                                                                                               |                                                                                                                                                             |
|----------------------------------------------|----------------------------------------------------------------------------------------------------------------------------------------------------------------------------------------|------------------------------------------|--------------------|-------------------------------|-------------------------|--------------------|---------------------------------------------------------------------------------------------------------------------------------------------------------------------------------------------------------------------------------------------------------------------------------------------------------------------------------------------------------------------------------------------------------------------------------------------------------------------------------------------------------------|-------------------------------------------------------------------------------------------------------------------------------------------------------------|
| et al. 2009<br>Australia <sup>17</sup>       | discourses of palliative care nurses and doctors regarding the management of nutrition and hydration at the end of life in patients with severe brain injury and patients with cancer. | care units                               | 4 doctors          | analysis                      | and 4 interviews        | analysis           | was 'blurring boundaries'. It refers to difficulties when decisions are complex because there is a tension between actions that promote quality of life before death but may also prolong suffering. This is particularly difficult if dying is protracted and unpredictable.                                                                                                                                                                                                                                 | mixed management approach involving both curatively and palliative focused care including consideration of ethics and impact on professionals and families. |
| Good et al. 2011,<br>Australia <sup>18</sup> | To explore the perceptions of doctors regarding CAH for dying patients.                                                                                                                | Medicine, haematology and oncology units | 8 medical officers | Qualitative descriptive study | Face-to-face interviews | Discourse analysis | Professionals experience tensions surrounding uncertainty about the transition from curative to palliative care; communication with patient and family about dying; cultural expectations; conflicting views about effects of dehydration; technology and the media; hydration as being symbolic of hope; uncertainty as a battleground; and the futility of treatment. Negotiating transition from curative to palliative care is challenging for doctors, and decision-making re CAH is reflective of this. | More education of doctors regarding the effect of dehydration. Research regarding the impact of reducing intake of dying patients is needed.                |

|                                                     |                                                                                                                               |                                                                             |                                                          |                                 |                                                           |                                                                     |                                                                                                                                                                                                                                                                                                                                |                                                                                                                                                                                  |
|-----------------------------------------------------|-------------------------------------------------------------------------------------------------------------------------------|-----------------------------------------------------------------------------|----------------------------------------------------------|---------------------------------|-----------------------------------------------------------|---------------------------------------------------------------------|--------------------------------------------------------------------------------------------------------------------------------------------------------------------------------------------------------------------------------------------------------------------------------------------------------------------------------|----------------------------------------------------------------------------------------------------------------------------------------------------------------------------------|
| Higgins et al. 2014, Australia <sup>19</sup>        | To explore the perceptions of nurses regarding the provision and non-provision of ANH for dying patients.                     | Medical, oncology and haematology units                                     | Acute care nurses                                        | Qualitative, descriptive design | Focus groups                                              | Thematic analysis                                                   | The main theme identified was the tensions of nursing dying patients. These tensions were nurses' limited involvement in decision-making, the balancing of treatment which could comfort or cause discomfort to patients and families, managing uncertainty and considering the potential advantages of withdrawing treatment. | Palliative approach to care needed in acute care. Exploration of ethical issues nurses face in acute hospitals. Education for nurses on the effect of hydration and dehydration. |
| Chambaere, et al. 2014, Belgium <sup>20</sup>       | To explore decisions to withhold ANH.                                                                                         | All care settings                                                           | Doctors of deceased patients                             | Postal survey                   | Questionnaire                                             | Descriptive analysis then multivariate logistic regression analysis | Family often involved in decision-making (76%). Decisions to forgo assisted fluids and nutrition vary with patient characteristics: more likely for females, when dying in care home or hospital and when suffering from cancer or neurological disease.                                                                       | Call for improved advance care planning. Need for early communication to promote autonomy.                                                                                       |
| Cabañero-Martínez, et al. 2016, Spain <sup>21</sup> | To explore the perceptions, attitudes and opinions of health professionals regarding subcutaneous hydration of dying patents. | Specialist palliative care units registered in one of two regions of Spain. | Doctors and nurses working in specialist palliative care | Qualitative                     | 2 with nurse focus groups and 2 focus groups with doctors | Content analysis                                                    | The relationship of the professional team and the family was important in addressing family members' emotional and informational needs. Early intentional communication focusing on emotional and informational needs is essential.                                                                                            | Authors recommend impact on protocols and guidelines for health management practices. A consistent approach is needed.                                                           |

| Studies within Narrative C: Professional support for family members of patients with diminishing drinking |                                                                                                    |                                                                              |                     |             |                       |                   |                                                                                                                                                                                                                                                                             |                                                                                                                               |
|-----------------------------------------------------------------------------------------------------------|----------------------------------------------------------------------------------------------------|------------------------------------------------------------------------------|---------------------|-------------|-----------------------|-------------------|-----------------------------------------------------------------------------------------------------------------------------------------------------------------------------------------------------------------------------------------------------------------------------|-------------------------------------------------------------------------------------------------------------------------------|
| Acronyms used: Artificial nutrition and hydration (ANH). Clinically assisted hydration (CAH)              |                                                                                                    |                                                                              |                     |             |                       |                   |                                                                                                                                                                                                                                                                             |                                                                                                                               |
| Citation and location                                                                                     | Study aims                                                                                         | Study setting                                                                | Sample              | Methodology | Data collection       | Data Analysis     | Findings                                                                                                                                                                                                                                                                    | Recommendations                                                                                                               |
| Clark et al., 2017 New Zealand <sup>22</sup>                                                              | To explore specialist palliative care practice regarding decreasing oral intake of dying patients. | Specialist palliative care including in-patient, community and hospital team | 2 doctors, 8 nurses | Qualitative | One-to-one interviews | Thematic analysis | Three themes emerged. Palliative care professionals see declining intake as part of dying process. They recognise significance of this change and respond empathically, focusing on support, enjoyment and safety. Communication with family is important to professionals. | Future research into conversations of professionals and care recipients to develop care strategies and support communication. |

## References

1. Meares CJ. Primary caregiver perceptions of intake cessation in patients who are terminally ill. *Oncol Nurs Forum* 1997; 24(10): 1751–1757.
2. McClement SE, Degner LF and Harlos M. Family responses to declining intake and weight loss in a terminally ill relative. Part 1: Fighting Back. *J Palliat Care* 2004; 20(2): 93–100.
3. McClement SE and Harlos M. When advanced cancer patients won't eat: Family responses. *Int J Palliat Nurs* 2008; 14: 182–188.
4. Yamagishi A, Morita T, Miyashita M, et al. The care strategy for families of terminally ill cancer patients who become unable to take nourishment orally: Recommendations from a national survey of bereaved family members' experiences. *J Pain and Symptom Management* 2010; 40: 671–83.
5. Raijmakers NJH, Clark JB, van Zuylen L, et al. Bereaved relatives' perspectives of the patient's oral intake towards the end of life: A qualitative study. *Palliat Med* 2013; 27(7): 665–672.
6. Musgrave CF, Bartal N and Opstad J. Intravenous hydration for terminal patients: What are the attitudes of Israeli terminal patients, their families, and their health professionals? *J Pain Symptom Manage* 1996; 12(1): 47–51.
7. Parkash R and Burge F. The family's perspective on issues of hydration in terminal care. *J Palliat Care* 1997; 13: 23–27.
8. Morita T, Tsunoda J, Inoue S, et al. Perceptions and decision-making on rehydration of terminally ill cancer patients and family members. *Am J Hosp Palliat Care* 1999; 16(3): 509–516.
9. Morita T, Miyashita M, Shibagaki M, et al. Knowledge and beliefs about end-of-Life care and the effects of specialized palliative care: A population-based survey in Japan. *J Pain Symptom Manage* 2006; 31(4): 306–316.
10. Rurup ML, Onwuteaka-Philipsen B, Pasman HR, et al. Attitudes of physicians, nurses and relatives towards end-of-life decisions concerning nursing home patients with dementia. *Patient Educ Couns* 2006; 61: 372–380.

11. Cohen MZ, Torres-Vigil I, Burbach BE, et al. The meaning of parenteral hydration to family caregivers and patients with advanced cancer receiving hospice care. *J Pain Symptom Manage* 2012; 43(5): 855–865.
12. Torres-Vigil I, Cohen MZ, de la Rosa A, et al. Food or medicine: Ethnic variations in perceptions of advanced cancer patients and their caregivers regarding artificial hydration during the last weeks of life. *BMJ Support Palliat Care* 2012; 2(3): 275–279.
13. Bükki J, Unterpaul T, Nübling G, et al. Decision making at the end of life—cancer patients' and their caregivers' views on artificial nutrition and hydration. *Support Care Cancer* 2014; 22: 3287–3299.
14. Critchlow J and Bauer-Wu SM. Dehydration in terminally ill patients: Perceptions of long-term care nurses. *J Gerontol Nurs* 2002; 28(12): 31–39.
15. Ke LS, Chiu TY, Hu WY, et al. Effects of educational intervention on nurses' knowledge, attitudes, and behavioural intentions toward supplying artificial nutrition and hydration to terminal cancer patients. *Support Care Cancer* 2008; 16: 1265–1272.
16. van der Riet P, Good P, Higgins I, et al. Palliative care professionals' perceptions of nutrition and hydration at the end of life. *Int J Palliat Nurs* 2008; 14(3): 145–151.
17. van der Riet P, Higgins I, Good P, et al. A discourse analysis of difficult clinical situations in relation to nutrition and hydration during the end of life. *J Clin Nurs* 2009; 18: 2104–2111.
18. Good P, Sneesby L, Higgins I, et al. Medical officers in acute care settings: Their views on medically assisted hydration at the end of life. *J Palliat Care* 2011; 27(4): 303–309.
19. Higgins I, van der Riet P, Sneesby L, et al. Nutrition and hydration in dying patients: The perceptions of acute care nurses. *J Clin Nurs* 2014; 23: 2609–2617.
20. Chambaere K, Loodts I, Deliëns L, et al. Forgoing artificial nutrition or hydration at the end of life: A large cross-sectional survey in Belgium. *J Med Ethics* 2014; 40: 501–504.

21. Cabañero-Martínez MJ, Velasco-Álvarez ML, Ramos-Pichardo J, et al. Perceptions of health professionals on subcutaneous hydration in palliative care: A qualitative study. *Palliat Med* 2016; 30: 549–557.
22. Clark J, Raijmakers NJH, Allan S, et al. Declining oral intake towards the end of life: How to talk about it? A qualitative study. *Int J Palliat Nurs* 2017; 23(2): 74–82.
